# Supplementary material for: A smart tailor-made G-clip reporter for sensitive detection of G-triplet-containing sequences
Source: Royal Society of Chemistry journal article supplement (doi:10.1039/c5an00281h), 2015-01-01
Supplement: c5an00281h1.pdf [file c5an00281h1.pdf]

## Supporting Information

### **Smart tailor-made G-clip reporter for sensitive detection of G triplet containing sequence**

*Liang-Yuan Cai, Ji Nie, Yi-wei Zhang, Fang-Ting Zhang, Ying-Lin Zhou,\* Xin-Xiang  
Zhang\**

Beijing National Laboratory for Molecular Sciences (BNLMS), Key Laboratory of  
Bioorganic Chemistry and Molecular Engineering of Ministry of Education, College  
of Chemistry, Peking University, Beijing 100871, China

## Experimental Section

### Reagents

All DNA oligonucleotides (listed in Table S1) were synthesized by Sangon Biotech. Co., Ltd. (Shanghai, China). Vent (exo-) DNA polymerase, 10 ×ThermoPol Buffer (200 mM Tris-HCl, 100 mM KCl, 100 mM (NH<sub>4</sub>)<sub>2</sub>SO<sub>4</sub>, 20 mM MgCl<sub>2</sub>, 1% Triton X-100, pH 8.8), Nt.BstNBI and 10 × NEB 3.1 buffer (500 mM Tris-HCl, 1000 mM NaCl, 100 mM MgCl<sub>2</sub>, 1 mg/mL BSA, pH 7.9) were obtained from New England Biolabs (Beverly, MA). Deoxynucleotide solution mixture (dNTPs) was provided by Takara Biotechnology Co. Ltd (Dalian, China). Hemin was purchased from Sigma-Aldrich (St. Louis, MO, USA) and was dissolved in dimethylsulfoxide (DMSO) as 5 mM stock solution. TMB-2HCl (TMB: 4,4'- diamino- 3,3',5,5'- tetramethylbiphenyl) was purchased from Ameresco (USA). Other reagents were at least of analytical reagent grade. All solutions were prepared with ultrapure water purified with a Milli-Q purification system (Branstead, MA, U.S.A).

### Assay Based on G-Clip Strategy

A total 14 μL of target DNA and R4 was mixed in 1 ×ThermoPol Buffer and heated at 95 °C for 5 min and slowly cooled down (0.05 °C/s) to 25 °C on TC-512 Gradient PCR (TECHNE, UK). The above annealing procedure lasted about 30 minutes. After that, 6 μL hemin was added to form the colorimetric solution containing different concentrations of target, 2 μM Reporter, 15 μM hemin and 1 x ThermoPol buffer. A 4 μL of the above solution dropped into 96-well plate was mixed with 100 μL/well TMB-H<sub>2</sub>O<sub>2</sub> working solutions (0.12 mg/mL TMB·2HCl, 18 mM H<sub>2</sub>O<sub>2</sub>, 0.1 M NaH<sub>2</sub>PO<sub>4</sub>-Na<sub>2</sub>HPO<sub>4</sub>, pH 6.0) to start chromogenic reaction. After incubating for 3 min in dark at room temperature, 50 μL/well 2 M H<sub>2</sub>SO<sub>4</sub> was added to terminate the reaction. Then the absorbance was recorded as (A<sub>450</sub>-A<sub>620</sub>), a dual wavelength mode by Thermo Scientific Multiskan FC Microplate Photometer (USA).

### Circular Dichroism Spectrometry Analysis

CD spectra (220-320 nm) were recorded on a Jasco J-810 spectra polarimeter (JASCO, Japan) at a rate of 100 nm/min with a 1 cm path length quartz cell at 25 °C.

### **Isothermal Exponential Amplification Reaction (EXPAR) for target**

The mixtures for EXPAR were prepared separately as part A and part B. Part A consisted of the template X'-X', dNTP mixture, NEB buffer 3.1 and the target DNA. Part B consisted of vent (exo-) DNA polymerase, Nt.BstNBI, and ThermoPol buffer. Parts A and B were mixed immediately before being placed in PCR machine. The EXPAR was performed at 58 °C in a volume of 10 µL solution containing X'-X' (200 nM), dNTPs (375 µM), vent (exo-) DNA polymerase (0.05 U/µL), Nt.BstNBI (0.4 U/µL), 1× ThermoPol buffer, 0.5× NEB buffer 3.1 and the target DNA with different concentrations. After incubating for 50 min, the reaction was quenched at 4 °C. The reaction product was subsequently used for the G-clip based assay.

Table S1 DNA sequences used in this work

| Name                 | Sequence (5' to 3')                                                 |
|----------------------|---------------------------------------------------------------------|
| TS Mutant            | ATTAGGATAGATATACGGGTCAGG                                            |
| R0                   | GGGTGGGTTGGGGTATATCTATCCTAAT                                        |
| R1                   | GGGTGGGTTGGGCTATATCTATCCTAAT                                        |
| R2                   | GGGTGGGTTGGGCAATATCTATCCTAAT                                        |
| R3                   | GGGTGGGTTGGGCATTATCTATCCTAAT                                        |
| R4                   | GGGTGGGTTGGGCATAATCTATCCTAAT                                        |
| R5                   | GGGTGGGTTGGGCATATTCTATCCTAAT                                        |
| TS Normal            | GGGCCATAGGATATACGGTTCAGG                                            |
| Random               | GGAATAACATGACCTGGATGCA                                              |
| Single-base mismatch | ATTACGATAGATATACGGGTCAGG                                            |
| C Region             | GTATATCTATCCTAAT                                                    |
| G Region             | GGGTGGGTTGGG                                                        |
| Template X'-X'       | CCTGAACCCGTATATCTATCCTAATAACAGACTCTCCTGAACCCGTATATCT<br>ATCCTAATA-P |

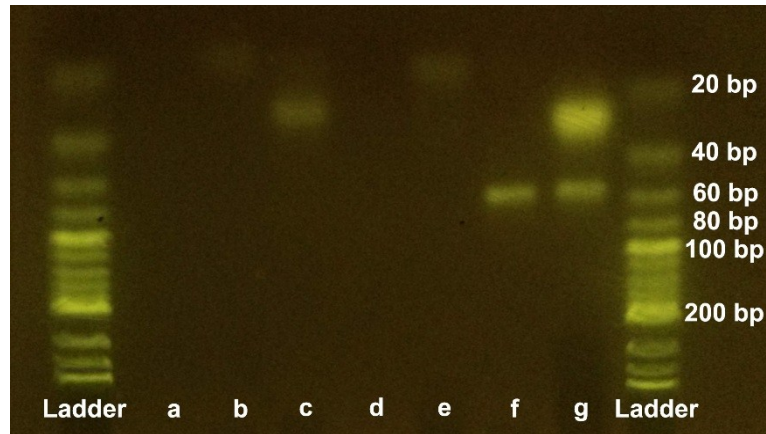

Figure S1 Analysis of the G-clip based assay by 2.5% agarose gel electrophoresis. All samples are prepared in reaction buffer. Lane a: 1  $\mu$ M target; Lane b: 2  $\mu$ M R4; Lane c: 1  $\mu$ M target and 2  $\mu$ M R4; Lane d: EXPAR initiation solution (100 pM target, 200 nM template X'-X', 375  $\mu$ M dNTPs, 0.05 U/ $\mu$ L vent (exo-) DNA polymerase, 0.4 U/ $\mu$ L Nt.BstNBI, 1 $\times$  ThermoPol buffer, 0.5 $\times$  NEB buffer 3.1); Lane e: EXPAR initiation solution with 2  $\mu$ M R4; Lane f: EXPAR final solution; Lane g: EXRAR final solution with 2  $\mu$ M R4.

Agarose gel electrophoresis has been done to verify the formation of target/reporter complex and EXPAR product. Lane a, b, c are the electrophoresis results for target, reporter (R4) and target/reporter complex respectively. Target, an ssDNA, exhibits no observable band. There is a light-colored band in the lane for reporter, which migrates above 20bp marker, for the reporter R4 exists in a hairpin structure in room temperature (simulated by the software DNAMAN). An obvious band is found for target/reporter complex, which migrates between 20 and 30 bp markers. These results demonstrate the effective binding of target and reporter. Lane d is the result for EXPAR initial solution, where the concentration of target is 100 pM, and lane e is for EXPAR initial solution with reporter. In EXPAR initial solution, no band for target/reporter complex is observed, which means the concentration of initial target is too small to be detected. Lane f is the electrophoresis result for the sample after EXPAR, and lane g is for the EXPAR final solution with reporter added. The band migrating similar to 60 bp marker in lane f is the 62 bp dsDNA produced in EXPAR process. Besides the band for 62 bp dsDNA, Lane g shows a far brighter band in the position of target/reporter complex, indicating that target is effectively amplified through EXPAR.

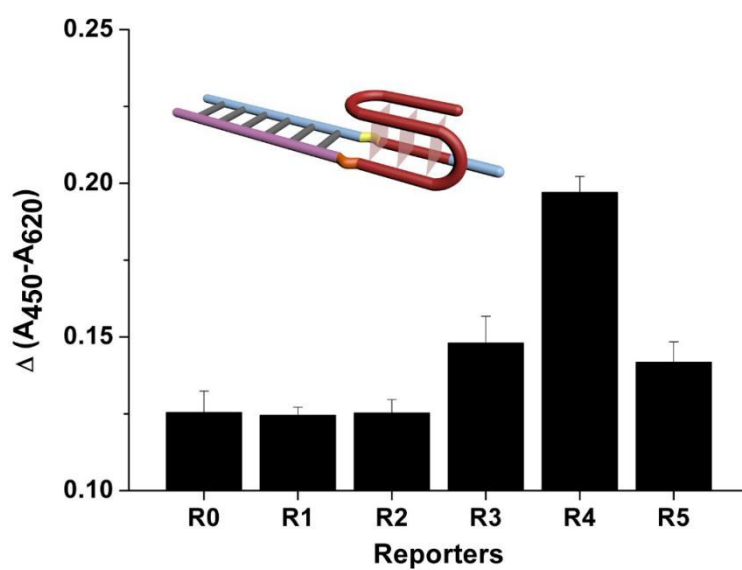

Figure S2 Optimization of the number of unpairing bases between G region and C region in G-clip reporter. We tested six G-clip reporters, namely R0 to R5, with different number of mismatched bases to the target, ranging from 0 to 5 respectively.  $\Delta A$  means the signal change in the presence and absence of target. Concentrations:  $C_{\text{reporter}}=4 \mu\text{M}$ ;  $C_{\text{target}}=250 \text{ nM}$ . Error bars represent SDs of three independent experiments.

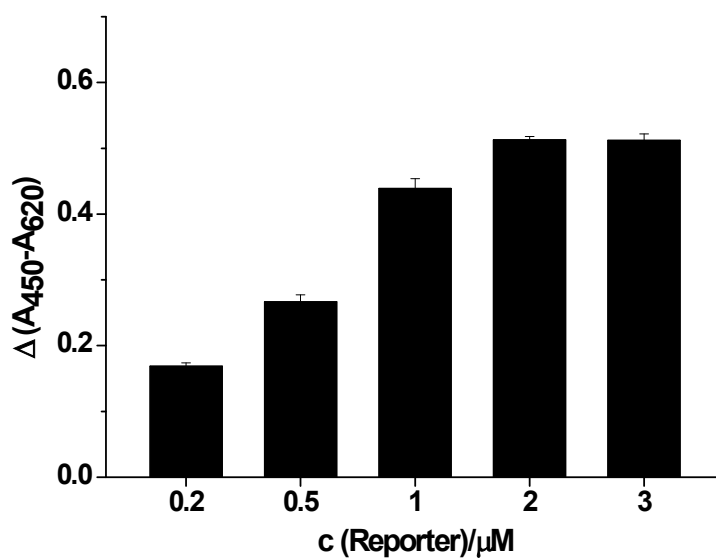

Figure S3 Optimization of the concentration of reporter.  $\Delta A$  means the signal change in the presence and absence of target. The concentration of the target is 1  $\mu\text{M}$ . Error bars represent SDs of three independent experiments.

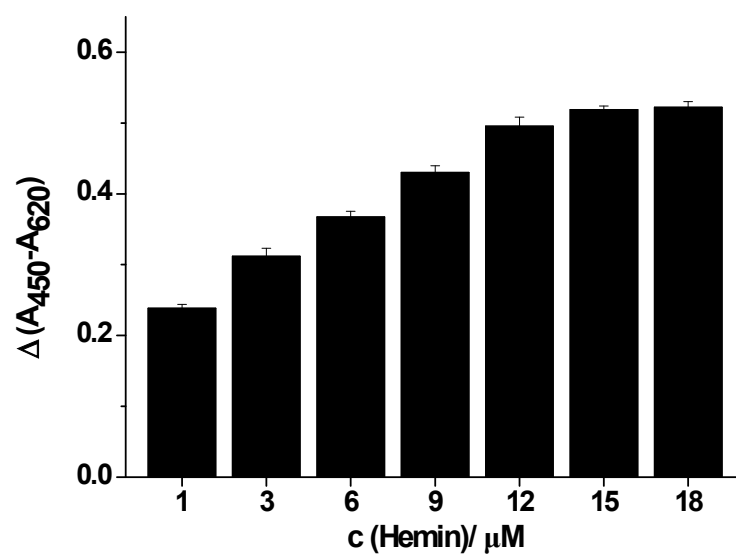

Figure S4 Optimization of hemin concentration. Concentrations:  $C_{\text{target}}=1 \mu\text{M}$ ,  $C_{R4}=2 \mu\text{M}$ . Error bars represent SDs of three independent experiments.



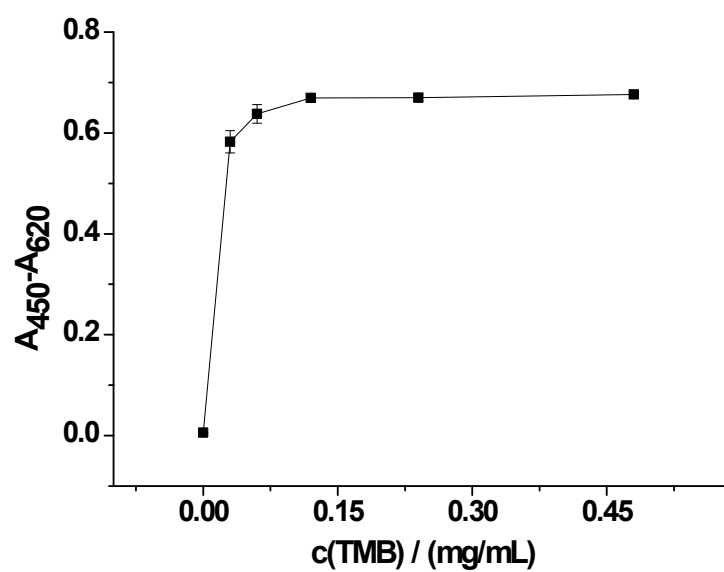

Figure S5 Optimization of TMB concentration. The experiments are done in 0.1 M NaH<sub>2</sub>PO<sub>4</sub>-Na<sub>2</sub>HPO<sub>4</sub> buffer (pH 6.0). C<sub>H<sub>2</sub>O<sub>2</sub></sub>, C<sub>target</sub>, C<sub>R4</sub> and C<sub>hemin</sub> are 18 mM, 1 μM, 2 μM, and 15 μM respectively. Error bars represent SDs of three independent experiments.

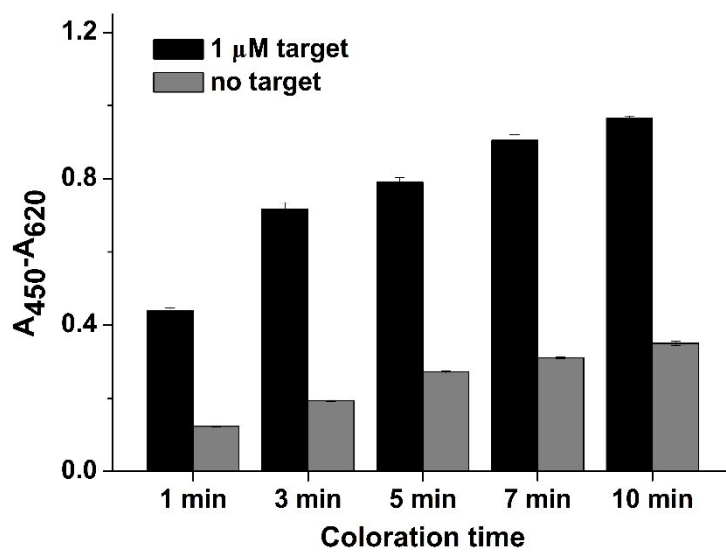

Figure S6 Optimization of coloration time of the TMB. The experiments are done in 0.1 M  $\text{NaH}_2\text{PO}_4$ - $\text{Na}_2\text{HPO}_4$  buffer (pH 6.0).  $C_{\text{TMB}}$ ,  $C_{\text{H}_2\text{O}_2}$ ,  $C_{\text{hemin}}$  and  $C_{\text{R4}}$  are 0.12 mg/mL, 18 mM, 15  $\mu$ M, and 2  $\mu$ M respectively. Error bars represent SDs of three independent experiments.
